# Supplementary material for: Outer dynein arm docking complex subunit 2 polymorphism rs7893462 modulates hepatocellular carcinoma susceptibility and can serve as an overall survival biomarker for hepatitis B virus-related hepatocellular carcinoma after hepatectomy: a cohort study with a long-term follow-up
Source: Springer Nature journal article supplement (doi:10.1186/s12957-023-03205-4), 2023-10-13
Supplement: MOESM1 [file 26178066]

**Table S1.** Clinical parameters of HBV-related HCC patients in the First Affiliated Hospital of Guangxi Medical University cohort

| <b>Variables</b>           | <b>Patients(n=468)</b> | <b>No. of events</b> | <b>MST(months)</b> | <b>HR (95% CI)</b> | <b>Log-rank P</b> |
|----------------------------|------------------------|----------------------|--------------------|--------------------|-------------------|
| <b>Age (years)</b>         |                        |                      |                    |                    | 0.542             |
| ≤60                        | 414                    | 193                  | 65                 | 1                  |                   |
| >60                        | 54                     | 25                   | 44                 | 1.137(0.749-1.727) |                   |
| <b>Gender</b>              |                        |                      |                    |                    | 0.222             |
| Male                       | 414                    | 199                  | 58                 | 1                  |                   |
| Female                     | 54                     | 19                   | 80                 | 0.748(0.467-1.198) |                   |
| <b>Ethnicity</b>           |                        |                      |                    |                    | 0.194             |
| Han                        | 296                    | 136                  | 71                 | 1                  |                   |
| Minority                   | 172                    | 82                   | 51                 | 1.199(0.910-1.580) |                   |
| <b>BMI</b>                 |                        |                      |                    |                    | 0.993             |
| ≤25                        | 369                    | 167                  | 61                 | 1                  |                   |
| >25                        | 99                     | 51                   | 57                 | 1.001(0.731-1.372) |                   |
| <b>Smoking status</b>      |                        |                      |                    |                    | 0.214             |
| None                       | 308                    | 140                  | 71                 | 1                  |                   |
| Ever                       | 160                    | 78                   | 44                 | 1.191(0.902-1.574) |                   |
| <b>Drinking status</b>     |                        |                      |                    |                    | 0.09              |
| None                       | 284                    | 125                  | 75                 | 1                  |                   |
| Ever                       | 184                    | 93                   | 48                 | 1.260(0.963-1.650) |                   |
| <b>Child–Pugh §</b>        |                        |                      |                    |                    | 0.304             |
| A                          | 381                    | 173                  | 63                 | 1                  |                   |
| B                          | 58                     | 31                   | 39                 | 1.220(0.832-1.789) |                   |
| <b>Cirrhosis £</b>         |                        |                      |                    |                    | 0.471             |
| No                         | 56                     | 24                   | 82                 | 1                  |                   |
| Yes                        | 411                    | 194                  | 57                 | 1.168(0.764-1.785) |                   |
| <b>Radical resection b</b> |                        |                      |                    |                    | 0.044             |
| Yes                        | 261                    | 112                  | 75                 | 1                  |                   |

|                                      |     |     |     |                    |         |
|--------------------------------------|-----|-----|-----|--------------------|---------|
| No                                   | 198 | 103 | 41  | 1.314(1.005-1.717) |         |
| <b>Pathological diagnosis k</b>      |     |     |     |                    | 0.551   |
| Well differentiated                  | 25  | 10  | 79  | 1                  |         |
| Moderately differentiated            | 361 | 171 | 57  | 1.223(0.646-2.315) |         |
| Poorly differentiated                | 11  | 3   | NA  | 0.724(0.199-2.632) |         |
| <b>Tumor size</b>                    |     |     |     |                    | <0.0001 |
| ≤5 cm                                | 189 | 60  | 123 | 1                  |         |
| >5 cm                                | 279 | 158 | 40  | 2.207(1.639-2.973) |         |
| <b>Tumor number</b>                  |     |     |     |                    | 0.004   |
| Single                               | 346 | 148 | 68  | 1                  |         |
| Multiple                             | 122 | 70  | 36  | 1.151(1.139-2.015) |         |
| <b>BCLC</b>                          |     |     |     |                    | <0.0001 |
| A                                    | 277 | 96  | 96  | 1                  |         |
| B                                    | 74  | 40  | 71  | 1.769(1.221-2.561) |         |
| C                                    | 117 | 82  | 22  | 3.355(2.486-4.527) |         |
| <b>portal vein tumor thrombus hu</b> |     |     |     |                    | <0.0001 |
| No                                   | 383 | 155 | 80  | 1                  |         |
| Yes                                  | 84  | 63  | 18  | 3.363(2.494-4.535) |         |
| <b>Serum AFP λ</b>                   |     |     |     |                    | 0.041   |
| AFP≤400 (ng/mL)                      | 241 | 102 | 68  | 1                  |         |
| AFP >400 (ng/mL)                     | 193 | 96  | 42  | 1.334(1.009-1.765) |         |

**Notes:** § Information of Child–Pugh was unavailable in 29 patients; £ Information of cirrhosis was unavailable in 1 patients; b Information of radical resection was unavailable in 9 patients; k Information of Pathological diagnosis was unavailable in 71 patients; hu Information of PVTT was unavailable in 1 patients; λ Information of AFP was unavailable in 34 patients.

**Abbreviation:** HBV, hepatitis B virus; HCC, hepatocellular carcinoma; HR, hazard ratio; CI, confidence interval; MST, median survival time; PVTT, portal vein tumor thrombus; BCLC, Barcelona Clinic Liver Cancer; AFP,  $\alpha$ -fetoprotein; NA, not available, BMI, Body Mass Index.
